# Supplementary material for: Micro-Raman spectroscopy of lipid halo and dense-core amyloid plaques: aging process characterization in the Alzheimer's disease APPswePS1ΔE9 mouse model
Source: Royal Society of Chemistry journal article supplement (doi:10.1039/d1an01078f), 2021-01-01
Supplement: d1an01078f8.pdf [file d1an01078f8.pdf]

### S1. Table of the Molecular Vibrational Frequencies and Mode Assignments

| Frequency values (cm <sup>-1</sup> ) | Assignments                                                                                                                       |
|--------------------------------------|-----------------------------------------------------------------------------------------------------------------------------------|
| 418-429                              | cholesterol, cholesterol ester                                                                                                    |
| 702                                  | cholesterol, cholesterol ester                                                                                                    |
| 719-725                              | sphingomyelin, C-N (membrane phospholipid head), symmetric stretch vibration of choline group, characteristic for phospholipids   |
| 763                                  | ethanolamine group, phosphatidylethanolamine                                                                                      |
| 782-791                              | cytosine/uracil ring breathing (nucleotide), phosphodiester bands in DNA, uracil, thymine, DNA: O P O, cytosine, pyrimidine       |
| 876                                  | C-C-N+ symmetric stretching (lipids)                                                                                              |
| 1007, 1022, 1033                     | phenylalanine (symmetric ring breathing), phenylalanine mode                                                                      |
| 1064-1069                            | skeletal C-C stretch of lipids, triglycerides (fatty acids)                                                                       |
| 1104                                 | vibration (C-C), lipids, fatty acids                                                                                              |
| 1090                                 | phospholipids acyl chains                                                                                                         |
| 1131                                 | fatty acid                                                                                                                        |
| 1203-1263                            | amide III ( $\beta$ sheet) arising from coupling of C-N stretching and N-H                                                        |
| 1267                                 | C-H lipid, =C-H phospholipids                                                                                                     |
| 1272, 1286                           | unsaturated fatty acids, scissoring (=CH)                                                                                         |
| 1295-1299                            | ceramide, palmitic acid, fatty acids, CH <sub>2</sub> deformation (lipid)                                                         |
| 1302                                 | fatty acid, phospholipids                                                                                                         |
| 1344                                 | nucleic acid modes (DNA and RNA)                                                                                                  |
| 1384, 1427                           | unassigned mode                                                                                                                   |
| 1428                                 | lipid band, cholesteryl palmitate                                                                                                 |
| 1437                                 | CH <sub>2</sub> deformation (lipid)                                                                                               |
| 1446                                 | CH <sub>2</sub> bending mode of proteins and lipids                                                                               |
| 1453                                 | CH <sub>2</sub> deformation, protein band                                                                                         |
| 1464                                 | fatty acids, cholesterol, cholesterol ester                                                                                       |
| 1494                                 | DNA                                                                                                                               |
| 1583                                 | pyrimidine ring (nucleic acids)                                                                                                   |
| 1610-1614                            | cytosine (NH <sub>2</sub> ), Tyrosine, Phenylalanine                                                                              |
| 1660                                 | amide I (C=O stretching) $\alpha$ -helix structure; (C-C) <i>cis</i> , lipids, fatty acids, C-C groups in unsaturated fatty acids |
| 1670-1675                            | amide I (C=O stretching) $\beta$ -sheet structure; cholesterol and its esters, (C-C) <i>trans</i> , lipids, fatty acids, ceramide |
| 1681                                 | glutamate, DNA unassigned mode                                                                                                    |
| 2727                                 | C-H stretches                                                                                                                     |
| 2843, 2850                           | CH <sub>2</sub> symmetric stretching of lipids (total lipids)                                                                     |
| 2880                                 | CH <sub>2</sub> asymmetric stretching of lipids and proteins                                                                      |
| 2930-2935                            | CH <sub>3</sub> symmetric stretching of lipids and proteins                                                                       |
| 2947                                 | C-H vibrations in lipids and proteins, asymmetric vibration CH <sub>2</sub> , lipids, fatty acids                                 |
| 2952                                 | CH <sub>3</sub> asymmetric stretching                                                                                             |
| 2968                                 | asymmetric vibration CH <sub>2</sub> , lipids, fatty acids, cholesterol and cholesterol ester                                     |
| 2972                                 | fatty acids                                                                                                                       |
| 3016                                 | CH <sub>2</sub> of lipids                                                                                                         |
| 070                                  | amide B (NH stretching, resonant with amide II in $\beta$ sheet), Fermi resonance                                                 |
