# Supplementary figures and images for: Micro-Raman spectroscopy of lipid halo and dense-core amyloid plaques: aging process characterization in the Alzheimer's disease APPswePS1ΔE9 mouse model
Source: Royal Society of Chemistry journal article supplement (doi:10.1039/d1an01078f), 2021-01-01

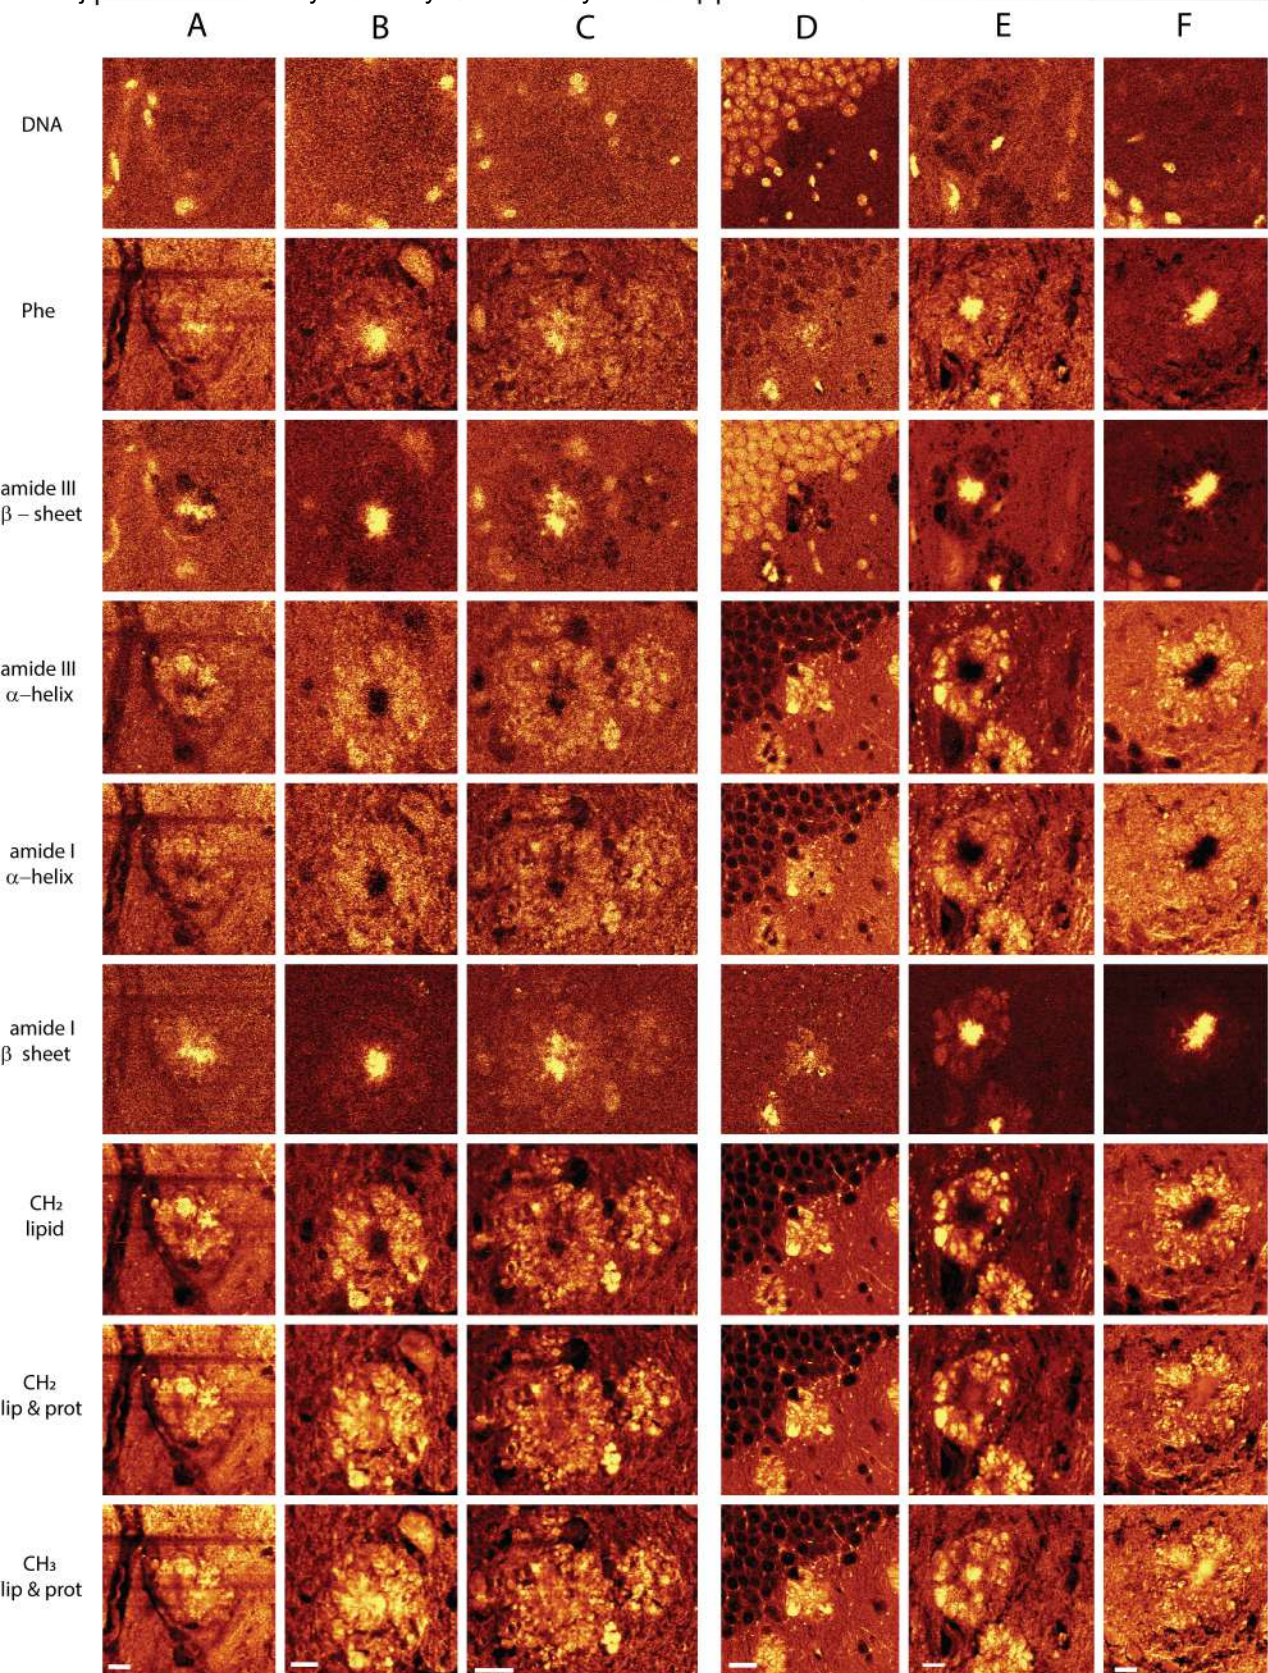

Supplement: d1an01078f2.pdf [file d1an01078f2.pdf]

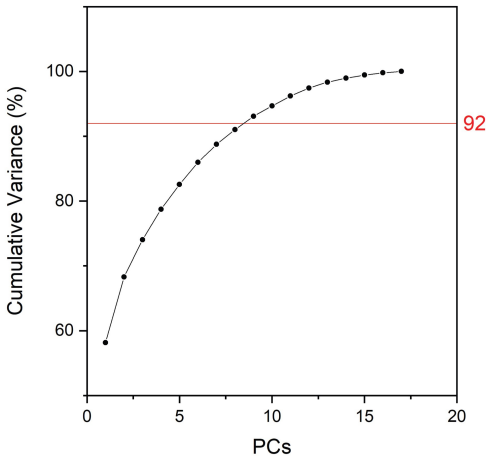

Supplement: d1an01078f3.pdf [file d1an01078f3.pdf]

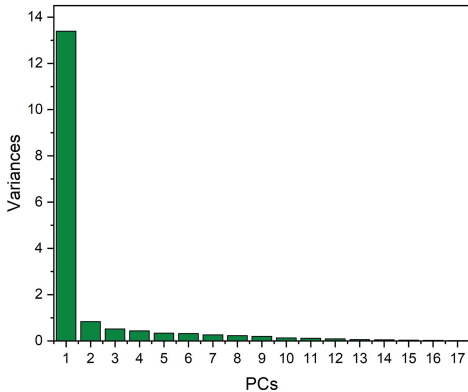

Supplement: d1an01078f5.pdf [file d1an01078f5.pdf]

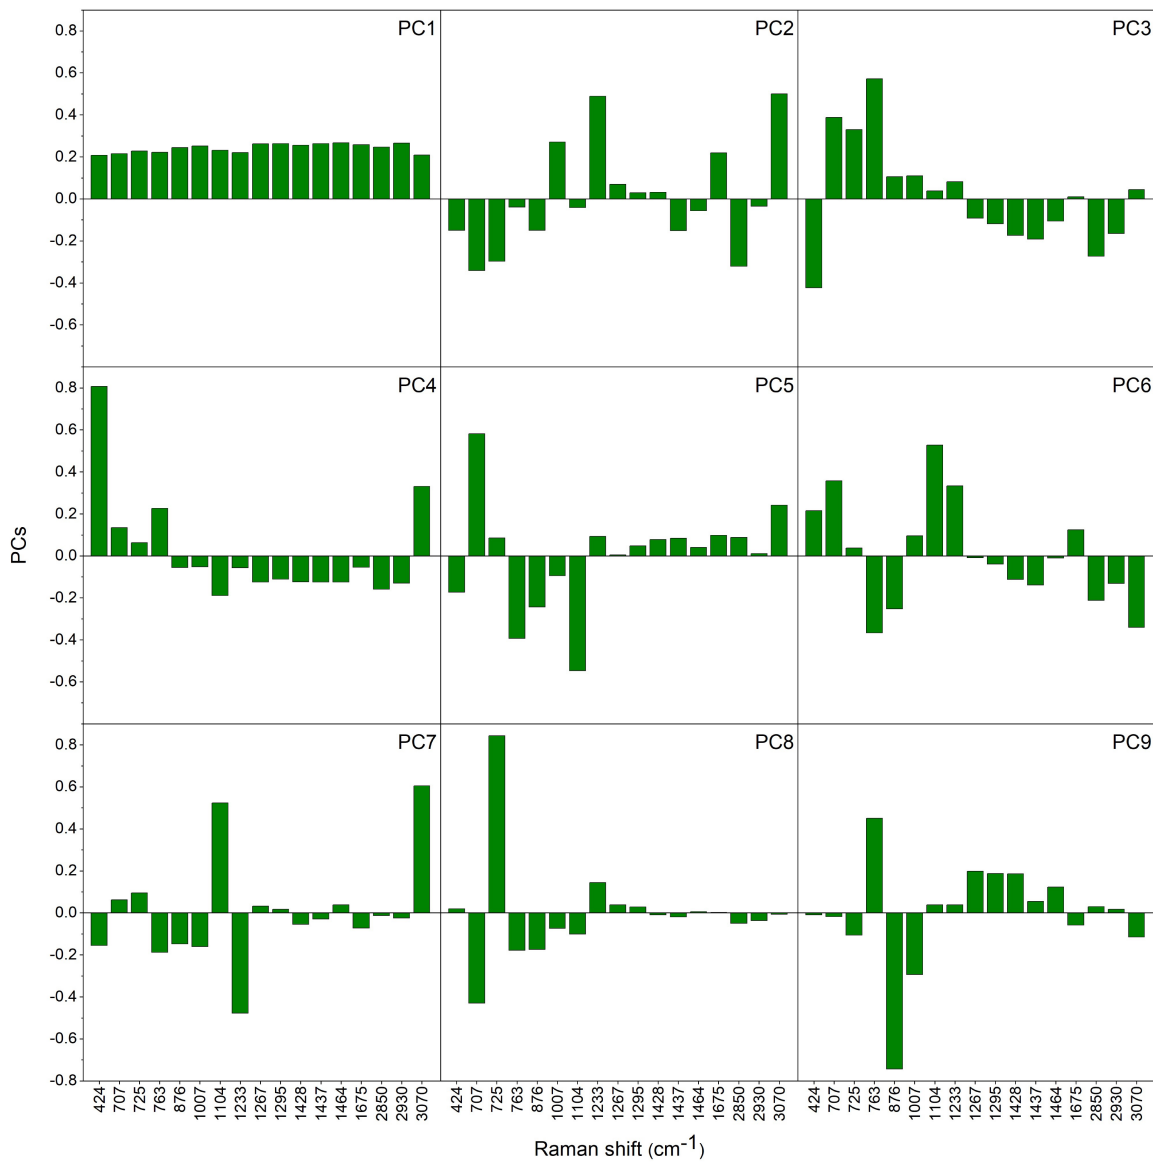

Supplement: d1an01078f6.pdf [file d1an01078f6.pdf]
